# Supplementary material
Source: HighWire-hosted journal article supplement (https://tsaco.smart01.highwire.org/content/9/1/e001291)
Supplement: inline-supplementary-material-1 [file inline-supplementary-material-1.pdf]

## The Disruption of Trauma Research: An Analysis of the Top Cited Versus Disruptive Trauma Research Publications

BRIEF TITLE (RUNNING HEAD): CITATION AND DISRUPTION IN TRAUMA RESEARCH

Joshua Dilday<sup>1</sup>, DO; Jessica Wu<sup>1</sup>, MD; Elliot Williams<sup>1</sup>, MD; Areg Grigorian<sup>2</sup>, MD; Brent Emigh<sup>3</sup>, MD; Kazuhide Matsushima<sup>1</sup>, MD; Morgan Schellenberg<sup>1</sup>, MD; Kenji Inaba<sup>1</sup>, MD; Matthew Martin<sup>1</sup>, MD

### AUTHOR AFFILIATIONS

- 1 Division of Trauma and Surgical Critical Care, Los Angeles General Medical Center, University of Southern California, Los Angeles, California.
- 2 Division of Trauma, Burns and Surgical Critical Care, University of California, Irvine, Orange County, California.
- 3 Division of Trauma and Surgical Critical Care, Brown University, Providence, Rhode Island

Jessica Wu: [jessica.wu@med.usc.edu](mailto:jessica.wu@med.usc.edu); Elliot Williams: [elliottwilliams@gmail.com](mailto:elliottwilliams@gmail.com); Areg Grigorian: [areg.grig@gmail.com](mailto:areg.grig@gmail.com); Brent Emigh: [emighb@gmail.com](mailto:emighb@gmail.com); Kazuhide Matsushima: [kazuhide.matsushima@med.usc.edu](mailto:kazuhide.matsushima@med.usc.edu); Morgan Schellenberg: [morgan.schellenberg@med.usc.edu](mailto:morgan.schellenberg@med.usc.edu); Kenji Inaba: [kenji.inaba@med.usc.edu](mailto:kenji.inaba@med.usc.edu); Matthew Martin: [matthew.martin@med.usc.edu](mailto:matthew.martin@med.usc.edu)

### Author Contribution:

JD: contributed in literature search, study design, data collection, data analysis, data interpretation, writing, and critical revision.

JW: study design, data collection, data interpretation, writing, and critical revision.

EW: study design, data interpretation, writing, and critical revision.

AG: contributed in study design, writing, and critical revision.

BE: contributed in study design, writing, and critical revision

KM: contributed in study design, writing, and critical revision.

MS: contributed in study design, writing, and critical revision.

KI: contributed in study design, writing, and critical revision.

MM: contributed in literature search, study design, data collection, data analysis, data interpretation, writing, and critical revision.

No author has any relevant conflicts of interest or funding to disclose.

The views presented here are the authors and do not necessarily reflect those of the United States government, the Department of Defense, or the United States Army.

Abstract word count: 284

Manuscript word count: 2401

### ADDRESS FOR CORRESPONDENCE AND REPRINTS

Joshua Dilday, DO

ORCID# 0000-0001-6747-0478

Division of Trauma and Surgical Critical Care

Los Angeles General Medical Center

2051 Marengo Street

Inpatient Tower, C5L100

Los Angeles, CA 90033

Phone: +1 (323)-340-0420

Fax: +1 (323) 441-990

E-mail: [joshua.c.dilday@gmail.com](mailto:joshua.c.dilday@gmail.com)

## SUPPLEMENTAL DATA

Supplemental Table 1. Selected journals and search terms.

This table shows the journals and search terms queried to identify publications.

| <b>Trauma Journal</b>                                               | <b>Non-Trauma Journal</b>                   | <b>Search Terms*</b>   |
|---------------------------------------------------------------------|---------------------------------------------|------------------------|
| Journal of Trauma                                                   | Journal of the American College of Surgeons | Hemorrhage             |
| Journal of Trauma and Acute Care Surgery                            | Lancet                                      | Trauma                 |
| Trauma Surgery and Acute Care Open                                  | Annals of Surgery                           | Injury                 |
| Injury                                                              | Shock                                       | Penetrating injury     |
| Acute Care Surgery                                                  | JAMA                                        | Blunt injury           |
| European Journal of Trauma and Emergency Surgery                    | JAMA Surgery                                | Traumatic brain injury |
| Scandinavian Journal of Trauma Resuscitation and Emergency Medicine | Archives of Surgery                         | Gunshot                |
|                                                                     | New England Journal of Medicine             | Stab                   |
|                                                                     | American Journal of Surgery                 | Knife                  |
|                                                                     | Surgery                                     | Bullet                 |
|                                                                     | Journal of Surgical Research                | Motor vehicle          |
|                                                                     | Critical Care Medicine                      | Hemorrhagic shock      |
|                                                                     |                                             | Tourniquet             |
|                                                                     |                                             | Traumatic wound        |
|                                                                     |                                             | Triage                 |
|                                                                     |                                             | Prehospital            |
|                                                                     |                                             | Trauma systems         |
|                                                                     |                                             | Injury prevention      |

\*Search terms only utilized for non-trauma journals. All articles from trauma journals were queried

Supplemental Table 2. The top 100 most disruptive publications in trauma (DS = disruptive score)

| Rank | Title                                                                                                                                                        | Authors                                          | Journal        | Citations | Year | DS   |
|------|--------------------------------------------------------------------------------------------------------------------------------------------------------------|--------------------------------------------------|----------------|-----------|------|------|
|      | Epidemiology of major trauma and trauma deaths in Los Angeles County                                                                                         | Demetriades D, Murray J, Sinz B, et al.          | J Am Coll Surg | 84        | 1998 | 0.76 |
| 2    | Pediatric trauma. The No. 1 killer of children                                                                                                               | Haller JA Jr.                                    | JAMA           | 61        | 1983 | 0.68 |
| 3    | Improved quality of care and reduction of housestaff workload using trauma nurse practitioners                                                               | Spisso J, O'Callaghan C, McKennan M, et al.      | J Trauma       | 106       | 1990 | 0.59 |
| 4    | Wheels-in-line roller skating injuries                                                                                                                       | Callé SC, Eaton RG.                              | J Trauma       | 50        | 1993 | 0.58 |
| 5    | Electrical injury                                                                                                                                            | Hartford CE, Ziffren SE.                         | J Trauma       | 4         | 1971 | 0.55 |
| 6    | Intensive care in a field hospital in an urban disaster area: lessons from the August 1999 earthquake in Turkey                                              | Halpern P, Rosen B, Carasso S, et al.            | Crit Care Med  | 34        | 2003 | 0.50 |
| 7    | The injured colon: therapeutic considerations                                                                                                                | Kirkpatrick JR, Rajpal SG.                       | Am J Surg      | 9         | 1975 | 0.49 |
| 8    | Hypogastric Artery Ligation for Uncontrollable Hemorrhage in Acute Pelvic Trauma                                                                             | Seavers r, Lynch J, Ballard R, et al.            | Surgery        | 8         | 1964 | 0.43 |
| 9    | Blunt trauma to the larynx and upper trachea: immediate treatment, complications and late reconstructive procedures                                          | Curtin JW, Holinger PH, Greeley PW.              | J Trauma       | 3         | 1966 | 0.41 |
| 10   | Clinical experience with axillary burns in children                                                                                                          | Law EJ, Hofer RW, MacMillan BG.                  | J Trauma       | 1         | 1972 | 0.40 |
| 11   | Injuries of the vena cava caused by external trauma                                                                                                          | Oschner JL, Crawford ES, De Bakey ME             | Surgery        | 10        | 1961 | 0.38 |
| 12   | The special injury pattern in terrorist bombings                                                                                                             | Kluger Y, Peleg K, Daniel-Aharonson L, et al.    | J Am Coll Surg | 102       | 2004 | 0.37 |
| 13   | Trauma and forensic medicine                                                                                                                                 | Carmona R, Prince K.                             | J Trauma       | 18        | 1989 | 0.36 |
| 14   | Family presence during trauma resuscitation: a survey of AAST and ENA members. American Association for the Surgery of Trauma. Emergency Nurses Association  | Helmer SD, Smith RS, Dort JM, et al.             | J Trauma       | 125       | 2000 | 0.36 |
| 15   | A history of the American Association for the Surgery of Trauma: the first 50 years                                                                          | Peltier LF, Davis JH.                            | J Trauma       | 7         | 1989 | 0.36 |
| 16   | Mechanical cornpicker hand injuries                                                                                                                          | Campbell DC 2nd, Bryan RS, Cooney WP 3rd, et al. | J Trauma       | 3         | 1979 | 0.35 |
| 17   | The value of healing by secondary intention for sizeable defects of the face                                                                                 | Goldwyn RM, Rueckert F.                          | Arch Surg      | 5         | 1977 | 0.35 |
| 18   | Posttraumatic ischemic stenosis of the small bowel                                                                                                           | Bryner UM, Longerbeam JK, Reeves CD.             | Arch Surg      | 36        | 1980 | 0.35 |
| 19   | Liver replacement after massive hepatic trauma                                                                                                               | Esquivel CO, Bernardos A, Makowka L, et al.      | J Trauma       | 39        | 1987 | 0.35 |
| 20   | Gunshot wounds of the face                                                                                                                                   | Yao ST, Vanecko RM, Corley RD, et al.            | J Trauma       | 1         | 1972 | 0.35 |
| 21   | Guidelines for hospital emergency medical service in a university hospital in France: a progress report                                                      | Murat JE, Vaur JL, Bernard JL, et al.            | Am J Surg      | 4         | 1980 | 0.33 |
| 22   | What's a trauma surgeon worth? A salary survey of the Eastern Association for the Surgery of Trauma                                                          | Fakhry SM, Watts DD.                             | J Trauma       | 14        | 2000 | 0.30 |
| 23   | Use of an intra-aortic balloon catheter tamponade for controlling intra-abdominal hemorrhage in man                                                          | Hughes CW                                        | Surgery        | 67        | 1954 | 0.30 |
| 24   | Arterial shunting as an adjunct to major limb revascularization                                                                                              | Nunley JA, Koman LA, Urbaniak JR.                | Ann Surg       | 56        | 1981 | 0.30 |
| 25   | Impalement injuries: the preferred approach                                                                                                                  | Ketterhagen JP, Wassermann DH.                   | J Trauma       | 34        | 1983 | 0.28 |
| 26   | Comparison of poly-N-acetyl glucosamine with commercially available topical hemostats for achieving hemostasis in coagulopathic models of splenic hemorrhage | Schwartzberg SD, Chan MW, Cole DJ, et al.        | J Trauma       | 35        | 2004 | 0.27 |
| 27   | Surgical management of soft tissue defects of the ankle-heel region                                                                                          | Bennett JE, Kahn RA.                             | J Trauma       | 0         | 1972 | 0.27 |
| 28   | Early operative management of isolated sternal fractures                                                                                                     | Richardson JD, Grover FL, Trinkle JK.            | J Trauma       | 3         | 1975 | 0.26 |

|    |                                                                                                                                                                          |                                                   |           |     |      |      |
|----|--------------------------------------------------------------------------------------------------------------------------------------------------------------------------|---------------------------------------------------|-----------|-----|------|------|
| 29 | Three or more rib fractures as an indicator for transfer to a Level I trauma center: a population-based study                                                            | Lee RB, Bass SM, Morris JA Jr, et al.             | J Trauma  | 101 | 1990 | 0.26 |
| 30 | Earthquake disaster in Nicaragua: reflections on the initial management of massive casualties                                                                            | Whittaker R, Fareed D, Green P, et al.            | J Trauma  | 4   | 1974 | 0.26 |
| 31 | Organ injury scaling: spleen and liver (1994 revision)                                                                                                                   | Moore EE, Cogbill TH, Jurkovich GJ, et al.        | J Trauma  | 754 | 1995 | 0.26 |
| 32 | Impalement wounds of the head and chest by reinforced steel bars with recovery: an unusual case report                                                                   | Okumori M, Futamura A, Tsukuura T, et al.         | J Trauma  | 17  | 1981 | 0.25 |
| 33 | The use of telemedicine for real-time video consultation between trauma center and community hospital in a rural setting improves early trauma care: preliminary results | Rogers FB, Ricci M, Caputo M, et al.              | J Trauma  | 91  | 2001 | 0.25 |
| 34 | Diagnosis and treatment of retained foreign bodies in the hand                                                                                                           | Anderson MA, Newmeyer WL 3rd, Kilgore ES Jr.      | Am J Surg | 205 | 1982 | 0.25 |
| 35 | Mandibular fractures: the problem patient                                                                                                                                | Eid K, Lynch DJ, Whitaker LA.                     | J Trauma  | 2   | 1976 | 0.25 |
| 36 | Acute injuries of peripheral arteries with associated bone and soft tissue injuries                                                                                      | Abdul Razeq MS, Mnaymneh W, Yacoubian HD.         | J Trauma  | 2   | 1973 | 0.25 |
| 37 | Subdural haematoma after whiplash injury                                                                                                                                 | Ommaya AK, Yarnell P.                             | Lancet    | 21  | 1969 | 0.24 |
| 38 | Development of a statewide trauma registry                                                                                                                               | Gillott AR, Thomas JM, Forrester C.               | J Trauma  | 30  | 1989 | 0.24 |
| 39 | Direct transfer to operating room improves care of trauma patients. A simple, economically feasible plan for large hospitals                                             | Fischer RP, Jelense S, Perry JF Jr.               | JAMA      | 4   | 1978 | 0.24 |
| 40 | The use of crosslinked gelatin as a tissue adhesive to control hemorrhage from liver and kidney                                                                          | Tatooles CJ, Braunwald NS.                        | Surgery   | 7   | 1966 | 0.24 |
| 41 | Electrical injuries: a review of 65 cases                                                                                                                                | DiVincenzi FC, Moncrief JA, Pruitt BA Jr.         | J Trauma  | 24  | 1969 | 0.24 |
| 42 | Degloving injuries of the extremities and torso                                                                                                                          | Kudsk KA, Sheldon GF, Walton RL.                  | J Trauma  | 64  | 1981 | 0.24 |
| 43 | Trauma and the veterinarian                                                                                                                                              | Landercasper J, Cogbill TH, Strutt PJ, et al.     | J Trauma  | 46  | 1988 | 0.23 |
| 44 | Assessing multiple trauma: is the cervical spine enough?                                                                                                                 | Pal JM, Mulder DS, Brown RA, et al.               | J Trauma  | 15  | 1988 | 0.22 |
| 45 | Carburetor priming: a cause of gasoline burn                                                                                                                             | Klabacha M, Nelson H, Parshley P, et al.          | J Trauma  | 8   | 1985 | 0.22 |
| 46 | Softball sliding injuries. A prospective study comparing standard and modified bases                                                                                     | Janda DH, Wojtys EM, Hankin FM, et al.            | JAMA      | 37  | 1988 | 0.22 |
| 47 | Burns in motor vehicle accidents                                                                                                                                         | Purdue GF, Hunt JL, Layton TR, et al.             | J Trauma  | 18  | 1985 | 0.22 |
| 48 | An integrated university emergency medicine - trauma program                                                                                                             | Geis WP, Altergott RA, Giacchino JL, et al.       | J Trauma  | 5   | 1982 | 0.21 |
| 49 | Relationship between weather and seasonal factors and trauma admission volume at a Level I trauma center                                                                 | Bhattacharyya T, Millham FH.                      | J Trauma  | 68  | 2001 | 0.21 |
| 50 | Informed consent: is it always necessary?                                                                                                                                | Parvizi J, Chakravarty R, Og B, et al.            | Injury    | 10  | 2008 | 0.21 |
| 51 | Use of the nonexpanded mesh graft                                                                                                                                        | Neale HW.                                         | J Trauma  | 1   | 1974 | 0.21 |
| 52 | Myth or reality: hematocrit and hemoglobin differ in trauma                                                                                                              | Nijboer JM, van der Horst IC, Hendriks HG, et al. | J Trauma  | 26  | 2007 | 0.21 |
| 53 | Open pelvic fracture: a lethal injury                                                                                                                                    | Rothenberger D, Velasco R, Strate R, et al.       | J Trauma  | 15  | 1978 | 0.20 |
| 54 | The surgery of traumatic arteriovenous fistulas and aneurysms: a five-year follow up study of 215 lesions                                                                | Hughes CW, Jahnke EJ Jr                           | Ann Surg  | 21  | 1958 | 0.20 |
| 55 | Haemothorax and thoracic spinal fracture. A case for early stabilization                                                                                                 | Dalvie SS, Burwell M, Noordeen MH.                | Injury    | 10  | 2000 | 0.20 |
| 56 | A Canadian National Trauma Registry: the time is now                                                                                                                     | McLellan BA.                                      | J Trauma  | 9   | 1997 | 0.20 |
| 57 | Primary closure of civilian colorectal wounds                                                                                                                            | Josen AS, Ferrer JM Jr, Forde KA, et al.          | Ann Surg  | 2   | 1972 | 0.20 |
| 58 | Major abdominal and thoracic trauma associated with spinal cord injury: problems in management                                                                           | Bricker DL, Waltz TA Jr, Telford RJ, et al.       | J Trauma  | 1   | 1971 | 0.20 |
| 59 | Small animal bites: the role of primary closure                                                                                                                          | Thomson HG, Svitek V.                             | J Trauma  | 6   | 1973 | 0.20 |

|    |                                                                                                                                                    |                                                                            |                            |     |      |      |
|----|----------------------------------------------------------------------------------------------------------------------------------------------------|----------------------------------------------------------------------------|----------------------------|-----|------|------|
|    | THE EARLY SURGICAL TREATMENT OF BURNS. I. EXPERIMENTAL STUDIES UTILIZING INTRAVENOUS VITAL DYE FOR DETERMINING THE DEGREE OF INJURY                | Randolf JG, Leape LL, Gross RE                                             | Surgery                    | 1   | 1964 | 0.19 |
| 60 | Remote cerebral effects on EEG in high-energy missile trauma                                                                                       | Göransson AM, Ingvar DH, Kutyna F.                                         | J Trauma                   | 14  | 1988 | 0.19 |
| 61 | Isolated gastric rupture due to blunt trauma                                                                                                       | Bussey HJ, McGehee RN, Tyson KR.                                           | J Trauma                   | 1   | 1975 | 0.19 |
| 62 | Prehospital stabilization of critically injured patients: a failed concept                                                                         | Smith JP, Bodai BI, Hill AS, Frey CF.                                      | J Trauma                   | 247 | 1985 | 0.19 |
| 63 | Children's traffic safety program: influence of early elementary school safety education on family seat belt use                                   | Hazinski MF, Eddy VA, Morris JA Jr.                                        | J Trauma                   | 27  | 1995 | 0.19 |
| 64 | High mortality in elderly drivers is associated with distinct injury patterns: analysis of 187,869 injured drivers                                 | Bauzá G, Lamorte WW, Burke PA, et al.                                      | J Trauma                   | 19  | 2008 | 0.19 |
| 65 | Burn injury. Analysis of survival and hospitalization time for 937 patients                                                                        | Curreri PW, Luterma A, Braun DW Jr, et al.                                 | Ann Surg<br>J Am Coll Surg | 144 | 1980 | 0.19 |
| 66 | Medical and surgical care of our four assassinated presidents                                                                                      | Trunkey D, Farjah F.                                                       | Surg                       | 4   | 2005 | 0.19 |
| 67 | Why am I here?                                                                                                                                     | Reath DB.                                                                  | J Trauma                   | 7   | 2000 | 0.19 |
| 68 | Renal trauma requiring surgery: an analysis of 185 cases                                                                                           | Sagalowsky AI, McConnell JD, Peters PC.                                    | J Trauma                   | 63  | 1983 | 0.18 |
| 69 | Traumatic aneurysm of the superficial temporal artery. Squash-ball disease                                                                         | Golden GT, Fox JW, Williams GS, et al.                                     | JAMA                       | 5   | 1975 | 0.18 |
| 70 | Treatment of open crushing type of industrial injuries of the hand and forearm: degloving, open circumferential, heat-press, and nail-bed injuries | Tajima T.                                                                  | J Trauma<br>Arch Surg      | 2   | 1974 | 0.18 |
| 71 | Railway surgery. Traumatology and managed health care in 19th-century United States                                                                | Rutkow IM.                                                                 | Surg                       | 8   | 1993 | 0.18 |
| 72 | The attempted assassination of President Reagan. Medical implications and historical perspective                                                   | Aaron BL, Rockoff SD. Sheldon GF, Kagarise MJ.                             | JAMA                       | 6   | 1994 | 0.18 |
| 73 | John Hunter and the American School of Surgery                                                                                                     | Schroeder FA, Viegas SF, Carmichael K.                                     | J Trauma                   | 5   | 1998 | 0.18 |
| 74 | Shrimp winch injuries                                                                                                                              | Carroll RE, Match RM.                                                      | J Trauma                   | 4   | 2008 | 0.18 |
| 75 | Common errors in the management of wrist lacerations                                                                                               | Shaftan GW, Chiu CJ, Dennis C, Harris B.                                   | J Trauma                   | 1   | 1974 | 0.18 |
| 76 | Fundamentals of physiologic control of arterial hemorrhage                                                                                         |                                                                            | Surgery                    | 14  | 1965 | 0.18 |
| 77 | Penetrating cardiac trauma. Experience with thirty-four patients in a hospital without cardiopulmonary bypass capability                           | Beach PM Jr, Bognolo D, Hutchinson JE, Jacobs LM Jr, Goody MM, Sinclair A. | Am J<br>Surg               | 3   | 1976 | 0.18 |
| 78 | The role of a trauma center in disaster management                                                                                                 | Gazzaniga AB, Stanton WW, Bartlett RH.                                     | J Trauma<br>Am J Surg      | 32  | 1983 | 0.18 |
| 79 | Laparoscopy in the diagnosis of blunt and penetrating injuries to the abdomen                                                                      | Richardson JD, Miller FB.                                                  | Am J<br>Surg               | 16  | 1976 | 0.18 |
| 80 | Will future surgeons be interested in trauma care? Results of a resident survey                                                                    | Brudvik C.                                                                 | J Trauma<br>Injury         | 139 | 1992 | 0.18 |
| 81 | Child injuries in Bergen, Norway                                                                                                                   |                                                                            |                            | 33  | 2000 | 0.18 |
| 82 | The quantitative swab culture and smear: A quick, simple method for determining the number of viable aerobic bacteria on open wounds               | Levine NS, Lindberg RB, Mason AD Jr, et al. Wood MH, Gerrick SJ, Lucas CE. | J Trauma<br>Am J Surg      | 67  | 1976 | 0.18 |
| 83 | Primary repair for closed lobar bronchus injury                                                                                                    |                                                                            | J Trauma<br>Am J Surg      | 1   | 1978 | 0.18 |
| 84 | Treatment of penetrating gunshot wounds of the chest. Experience with one hundred forty-five cases                                                 | Borja AR, Ransdell HT. Hoyt DB, Shackford SR, Fridland PH, et al.          | Surg                       | 4   | 1971 | 0.18 |
| 85 | Video recording trauma resuscitations: an effective teaching technique                                                                             | Hewitt RL, Sanders PW                                                      | J Trauma                   | 106 | 1988 | 0.17 |
| 86 | Acute Ureteral Obstruction from Gunshot: Report of an Unusual Case                                                                                 | Gant TD, Epstein LI.                                                       | Ann Surg<br>J Trauma       | 0   | 1965 | 0.17 |
| 87 | Low-velocity gunshot wounds to the maxillofacial complex                                                                                           | Luna GK, Maier RV, Pavlin EG, et al.                                       | J Trauma                   | 5   | 1979 | 0.17 |
| 88 | Incidence and effect of hypothermia in seriously injured patients                                                                                  | Hang YS, Lin GD, Miller JW.                                                | J Trauma                   | 292 | 1987 | 0.17 |
| 89 | Traumatic forequarter amputation: case report                                                                                                      | West JG, Cales RH, Gazzaniga AB.                                           | J Trauma<br>Arch Surg      | 1   | 1979 | 0.17 |
| 90 | Impact of regionalization. The Orange County experience                                                                                            |                                                                            | Surg                       | 285 | 1983 | 0.17 |
| 91 |                                                                                                                                                    |                                                                            |                            |     |      |      |

|     |                                                                                               |                                               |           |     |      |      |
|-----|-----------------------------------------------------------------------------------------------|-----------------------------------------------|-----------|-----|------|------|
| 92  | Therapeutic efficacy of Biobrane in partial- and full-thickness thermal injury                | McHugh TP, Robson MC, Heggers JP, et al.      | Surgery   | 38  | 1986 | 0.17 |
| 93  | Do it right, do the right thing                                                               | Hassett JM.                                   | J Trauma  | 3   | 1996 | 0.17 |
| 94  | The inadequacy of peritoneal lavage in diagnosing acute diaphragmatic rupture                 | Freeman T, Fischer RP.                        | J Trauma  | 4   | 1976 | 0.17 |
| 95  | Indications for operation for abdominal trauma                                                | Requarth W                                    | Surgery   | 3   | 1959 | 0.16 |
| 96  | Fractures of the mandible caused by stoning--return of an ancient entity                      | Nahlieli O, Baruchin AM, Neder A.             | J Trauma  | 0   | 1993 | 0.16 |
| 97  | The mesh skin graft in trauma: history and preliminary report on acute wound coverage         | Salisbury RB.                                 | J Trauma  | 0   | 1971 | 0.16 |
| 98  | A national alcohol and trauma center survey. Missed opportunities, failures of responsibility | Soderstrom CA, Cowley RA.                     | Arch Surg | 101 | 1987 | 0.16 |
| 99  | Etiology and clinical course of missed spine fractures                                        | Reid DC, Henderson R, Saboe L, et al.         | J Trauma  | 53  | 1987 | 0.16 |
| 100 | Management of massive thoraco-abdominal wall defect from close-range shotgun blast            | Carrasquilla C, Watts J, Ledgerwood A, et al. | J Trauma  | 13  | 1971 | 0.16 |

Supplemental Table 3. The top 100 most developmental publications in trauma (DS = disruptive score)

| Rank | Title                                                                                                           | Authors                                           | Journal   | Citations | Year | DS    |
|------|-----------------------------------------------------------------------------------------------------------------|---------------------------------------------------|-----------|-----------|------|-------|
| 1    | An overlapping pubic dislocation treated by closed reduction: case report and review of the literature          | Robinson D, Hendel D, Halperin N.                 | J Trauma  | 15        | 1989 | -0.54 |
| 2    | Traumatic forequarter amputation                                                                                | Layton TR, Vilella ER, Marrangoni AG.             | J Trauma  | 11        | 1981 | -0.40 |
| 3    | Traumatic hemipelvectomy: case report and literature review                                                     | Meester GL, Myerley WH.                           | J Trauma  | 3         | 1975 | -0.35 |
| 4    | Traumatic hemipelvectomy                                                                                        | Moore WM, Brown JJ, Haynes JL, et al.             | J Trauma  | 22        | 1987 | -0.35 |
| 5    | Internal fixation of an acetabular fracture during pregnancy                                                    | Dunlop DJ, McCahill JP, Blakemore ME.             | Injury    | 8         | 1997 | -0.33 |
| 6    | Complete evisceration of the small intestine through a perianal wound as a result of suction at a wading pool   | Gomez-Juarez M, Cascales P, Garcia-Olmo D, et al. | J Trauma  | 13        | 2001 | -0.30 |
| 7    | Anatomic considerations in penetrating gluteal wounds                                                           | Mercer DW, Buckman RF Jr, Sood R, et al.          | Arch Surg | 13        | 1992 | -0.28 |
| 8    | Stab wounds to the gluteal region: a management strategy                                                        | Makrin V, Sorene ED, Soffer D, et al.             | J Trauma  | 10        | 2001 | -0.28 |
| 9    | Propane thermal injuries: case report and review of the literature                                              | Matook GM, Sasken H, Akelman E.                   | J Trauma  | 7         | 1994 | -0.25 |
| 10   | Closed reduction of coronal fractures of the capitellum                                                         | Ochner RS, Bloom H, Palumbo RC, et al.            | J Trauma  | 57        | 1996 | -0.24 |
| 11   | Closed injuries of the pectoralis major muscle                                                                  | Tietjen R.                                        | J Trauma  | 66        | 1980 | -0.24 |
| 12   | Traumatic pseudodiverticulum of the esophagus in the newborn infant                                             | Armstrong RG, Lindberg EF, Stanford W, et al.     | Surgery   | 1         | 1970 | -0.23 |
| 13   | Complete traumatic transection of the thyroid gland                                                             | Oertli D, Harder F.                               | Surgery   | 17        | 1994 | -0.22 |
| 14   | Management of duodenal wounds                                                                                   | Stone HH, Fabian TC.                              | J Trauma  | 26        | 1979 | -0.21 |
| 15   | The use of pyloric exclusion in the management of severe duodenal injuries                                      | Vaughan GD 3rd, Frazier OH, Graham DY, et al.     | Am J Surg | 27        | 1977 | -0.21 |
| 16   | Traumatic abdominal wall hernia                                                                                 | Dubois PM, Freeman JB.                            | J Trauma  | 34        | 1981 | -0.21 |
| 17   | Prospective screening for blunt cerebrovascular injuries: analysis of diagnostic modalities and outcomes        | Miller PR, Fabian TC, Croce MA, et al.            | Ann Surg  | 311       | 2002 | -0.20 |
| 18   | Acute traumatic abdominal hernia: case reports                                                                  | Damschen DD, Landercasper J, Cogbill TH, et al.   | J Trauma  | 108       | 1994 | -0.20 |
| 19   | The Krukenberg procedure: a surgical option for the treatment of double hand amputees in Sierra Leone           | Irmay F, Merzougou B, Vettorel D.                 | Lancet    | 12        | 2000 | -0.20 |
| 20   | Penetrating stab wound of the gluteus--a potentially life-threatening injury: case reports                      | Feigenberg Z, Ben-Baruch D, Barak R, et al.       | J Trauma  | 8         | 1992 | -0.20 |
| 21   | Handlebar hernia: a rare traumatic abdominal wall hernia                                                        | Perez VM, McDonald AD, Ghani A, et al.            | J Trauma  | 27        | 1998 | -0.19 |
| 22   | Scapulothoracic dissociation caused by blunt trauma                                                             | Damschen DD, Cogbill TH, Siegel MJ.               | J Trauma  | 43        | 1997 | -0.19 |
| 23   | Open anterior dislocation of the hip in a child                                                                 | Khan SA, Sadiq SA, Abbas M, et al.                | J Trauma  | 11        | 2001 | -0.19 |
| 24   | The surgical management of duodenal trauma. Precepts based on a review of 247 cases                             | Snyder WH 3rd, Weigelt JA, Watkins WL, et al.     | Arch Surg | 117       | 1980 | -0.19 |
| 25   | Reliability of indications for cervical spine films in trauma patients                                          | Kreipke DL, Gillespie KR, McCarthy MC, et al.     | J Trauma  | 93        | 1989 | -0.19 |
| 26   | Ligation of the suprarenal vena cava and right nephrectomy with complete recovery                               | Ramnath R, Walden EC, Caguin F.                   | Am J Surg | 6         | 1966 | -0.18 |
| 27   | Handlebar hernia: case report and review of the literature                                                      | Kubalak G.                                        | J Trauma  | 51        | 1994 | -0.18 |
| 28   | Traumatic transdiaphragmatic intercostal hernia secondary to coughing: case report and review of the literature | Rogers FB, Leavitt BJ, Jensen PE.                 | J Trauma  | 24        | 1996 | -0.18 |
| 29   | Civilian parachute injuries; 10 years on and no lessons learned                                                 | Dawson M, Asghar M, Pryke S, et al.               | Injury    | 12        | 1998 | -0.18 |
| 30   | Superior gluteal artery aneurysm                                                                                | Williams W Jr, Jackson GF Jr, Greene C.           | J Trauma  | 3         | 1977 | -0.18 |
| 31   | Retained intrapulmonary bullet presenting with bronchial obstruction                                            | Kelley WA, James EC.                              | J Trauma  | 0         | 1976 | -0.18 |

|    |                                                                                                         |                                                        |                  |     |      |       |
|----|---------------------------------------------------------------------------------------------------------|--------------------------------------------------------|------------------|-----|------|-------|
| 33 | Traumatic dislocation of the testes                                                                     | Pollen JJ, Funckes C.                                  | J Trauma         | 24  | 1982 | -0.16 |
| 32 | Methods of controlling presacral bleeding                                                               | Hill AD, Menzies-Gow N, Darzi A.                       | J Am Coll Surg   | 22  | 1994 | -0.16 |
| 34 | Massive subgaleal hematoma resulting in skin compromise and airway obstruction                          | Nichter LS, Bolton LL, Reinisch JF, et al.             | J Trauma         | 15  | 1988 | -0.16 |
| 35 | Primary repair of colon wounds. A prospective trial in nonselected patients                             | George SM Jr, Fabian TC, Voeller GR, et al.            | Ann Surg         | 138 | 1989 | -0.16 |
| 36 | Traumatic lipomas/pseudolipomas                                                                         | Penoff JH.                                             | J Trauma         | 31  | 1982 | -0.16 |
| 37 | Fitness to drive in a below knee plaster? An evidence-based response                                    | Nunn T, Baird C, Robertson D, et al.                   | Injury           | 6   | 2007 | -0.16 |
| 38 | A new technique for delayed primary closure of fasciotomy wounds                                        | Chiverton N, Redden JF.                                | Injury           | 27  | 2000 | -0.16 |
| 39 | Lisfranc joint injuries: trauma mechanisms and associated injuries                                      | Vuori JP, Aro HT.                                      | J Trauma         | 123 | 1993 | -0.16 |
| 40 | Surgical judgment in the management of penetrating wounds of the abdomen: experience with 2212 patients | Nance FC, Wennar MH, Johnson LW, et al.                | Ann Surg         | 21  | 1974 | -0.15 |
| 41 | Nonoperative management of blunt splenic injury: a 5-year experience                                    | Haan JM, Bochicchio GV, Kramer N, et al.               | J Trauma         | 216 | 2005 | -0.15 |
| 43 | The scalp as a donor site: revisited                                                                    | Brou J, Vu T, McCauley RL, Herndon DN, et al.          | J Trauma         | 31  | 1990 | -0.15 |
| 42 | Gluteal stab wound is a frequent and potentially dangerous injury                                       | Susmallian S, Ezri T, Elis M, et al.                   | Injury Am J Surg | 8   | 2005 | -0.15 |
| 44 | Combined arterial, venous, and ureteral injury complicating lumbar disk surgery                         | Moore CA, Cohen A. Pozzati E, Gaist G, Vinci A, et al. | J Trauma         | 19  | 1982 | -0.15 |
| 45 | Traumatic interhemispheric subdural hematomas                                                           | Chappuis CW, Frey DJ, Dietzen CD, et al.               | Ann Surg         | 139 | 1991 | -0.15 |
| 46 | Management of penetrating colon injuries. A prospective randomized trial                                | Rupprecht H, Rumenapf G, Braig H, et al.              | J Trauma         | 20  | 1994 | -0.14 |
| 47 | Acute bleeding caused by rupture of the thyroid gland following blunt neck trauma: case report          | Lankford R, Block NL, Politano VA.                     | J Trauma         | 1   | 1974 | -0.14 |
| 48 | Gunshot wounds of the ureter: a review of 10 cases                                                      | Greenfield LJ, Hatcher CR Jr.                          | Ann Surg         | 1   | 1963 | -0.14 |
| 49 | Post-traumatic Internal Mammary Arteriovenous Fistula: Diagnostics Considerations and Report of a Case  | Snider HR                                              | Surgery          | 5   | 1956 | -0.14 |
| 50 | Acute duodenal obstruction secondary to intramural hematoma                                             | Haan JM, Biffi W, Knudson MM, et al.                   | J Trauma         | 188 | 2004 | -0.14 |
| 51 | Splenic embolization revisited: a multicenter review                                                    | Evans RN Jr, Foss FE.                                  | J Trauma         | 14  | 1984 | -0.14 |
| 52 | Traumatic hemipelvectomy in combination with traumatic amputation of an upper extremity                 | Hartz CR, Beckenbaugh RD.                              | J Trauma         | 5   | 1979 | -0.14 |
| 53 | Long-term results of resection of the distal ulna for post-traumatic conditions                         | Martin TD, Feliciano DV, Mattox KL, et al.             | Arch Surg        | 82  | 1983 | -0.14 |
| 54 | Severe duodenal injuries. Treatment with pyloric exclusion and gastrojejunostomy                        | Jones K, Sharp C, Mangram AJ, et al.                   | JAMA             | 83  | 2006 | -0.14 |
| 55 | The effects of preinjury clopidogrel use on older trauma patients with head injuries                    | Schoo MJ, Scott FA, Boswick JA Jr.                     | J Trauma         | 92  | 1980 | -0.13 |
| 56 | High-pressure injection injuries of the hand                                                            | Gates RL, Helmkamp JC, Wilson SL, et al.               | J Trauma         | 17  | 2002 | -0.13 |
| 57 | Deer stand-related trauma in West Virginia: 1994 through 1999                                           | Malone JV Jr, Spencer FC                               | Surgery          | 11  | 1956 | -0.13 |
| 58 | The nonoperative treatment of traumatic chylothorax                                                     | Massac E Jr, Siram SM, Leffall LD Jr.                  | Am J Surg        | 26  | 1983 | -0.13 |
| 59 | Penetrating neck wounds                                                                                 | Gregory JS, Flancbaum L, Townsend MC, et al.           | J Trauma         | 103 | 1991 | -0.13 |
| 60 | Incidence and timing of hypothermia in trauma patients undergoing operations                            | Balouris CA.                                           | Lancet           | 16  | 1990 | -0.13 |
| 61 | Rubber and plastic bullet eye injuries in Palestine                                                     | Blane CE, White SJ, Wesley JR, et al.                  | Surgery          | 26  | 1981 | -0.13 |
| 62 | Immediate traumatic pulmonary pseudocyst formation in children                                          | Netto FA, Hamilton P, Rizoli SB, et al.                | J Trauma         | 71  | 2006 | -0.13 |
| 63 | Traumatic abdominal wall hernia: epidemiology and clinical implications                                 | Ali J, Adam R, Stedman M, et al.                       | J Trauma         | 59  | 1994 | -0.13 |
| 64 | Cognitive and attitudinal impact of the Advanced Trauma Life Support program in a developing country    | Mansi MK, Emran M, el-Mahrouky A, et al.               | J Trauma         | 45  | 1993 | -0.13 |
| 65 | Experience with penile fractures in Egypt: long-term results of immediate surgical repair               |                                                        |                  |     |      |       |



|    |                                                                                                                          |                                                 |           |     |      |       |
|----|--------------------------------------------------------------------------------------------------------------------------|-------------------------------------------------|-----------|-----|------|-------|
| 66 | Metallic fragment embolization to the cerebral circulation                                                               | Kapp JP, Gielchinsky I, Jelsma R.               | J Trauma  | 2   | 1973 | -0.12 |
| 67 | Ureteral contusion with gunshot wounds                                                                                   | Cass AS.                                        | J Trauma  | 18  | 1984 | -0.12 |
| 68 | Major venous injury with pelvic fracture                                                                                 | Motsay GJ, Manlove C, Perry JF.                 | J Trauma  | 3   | 1969 | -0.12 |
| 69 | Posterior dislocation of the sternoclavicular joint with obstruction of the innominate vein: case report                 | Ono K, Inagawa H, Kiyota K, et al.              | J Trauma  | 58  | 1998 | -0.12 |
| 70 | Traumatic injury to the azygous vein: case report                                                                        | Butler DA, Schneider RF, Jadali M.              | J Trauma  | 14  | 1995 | -0.12 |
| 72 | Management of tar and asphalt injuries                                                                                   | Stratta RJ, Saffle JR, Kravitz M, et al.        | Am J Surg | 30  | 1983 | -0.12 |
| 71 | Car-surfing in southwest Ohio: incidence and injuries                                                                    | Carey J, McCarthy MC, Ekeh AP, et al.           | J Trauma  | 2   | 2005 | -0.12 |
| 73 | Traumatic and spontaneous pyeloduodenal fistulas                                                                         | McDougal WS, Persky L.                          | J Trauma  | 4   | 1972 | -0.12 |
| 74 | Halo-vest immobilization increases early morbidity and mortality in elderly odontoid fractures                           | Tashjian RZ, Majercik S, Biffi WL, et al.       | J Trauma  | 147 | 2006 | -0.12 |
| 75 | Treatment-related outcomes from blunt cerebrovascular injuries: importance of routine follow-up arteriography            | Biffi WL, Ray CE Jr, Moore EE, et al.           | Ann Surg  | 260 | 2002 | -0.12 |
| 76 | Nonunion of pelvic fractures                                                                                             | Ebraheim NA, Biyani A, Wong F.                  | J Trauma  | 9   | 1998 | -0.12 |
| 77 | Emergent abdominal sonography as a screening test in a new diagnostic algorithm for blunt trauma                         | Boulanger BR, McLellan BA, Brenneman FD, et al. | J Trauma  | 123 | 1996 | -0.12 |
| 78 | Blunt cerebrovascular injuries: diagnosis and treatment                                                                  | Miller PR, Fabian TC, Bee TK, et al.            | J Trauma  | 224 | 2001 | -0.12 |
| 79 | Traumatic hemipelvectomy: a report of successful reimplantation                                                          | Osti M, Mittler C, Putzke M, et al.             | Injury    | 14  | 2006 | -0.12 |
| 80 | Diagnostic and therapeutic laparoscopy for penetrating abdominal trauma: a multicenter experience                        | Zantut LF, Ivatury RR, Smith RS, et al.         | J Trauma  | 131 | 1997 | -0.12 |
| 81 | Human injury as a result of the recent foot and mouth crisis                                                             | Mitra S, Mallick A.                             | Injury    | 2   | 2003 | -0.12 |
| 82 | Traumatic abdominal wall hernia                                                                                          | Malangoni MA, Condon RE.                        | J Trauma  | 50  | 1983 | -0.12 |
| 83 | One hundred percent fascial approximation with sequential abdominal closure of the open abdomen                          | Cothren CC, Moore EE, Johnson JL, et al.        | JAMA      | 121 | 2006 | -0.12 |
| 84 | Traumatic hernia                                                                                                         | Guly HR, Stewart IP.                            | J Trauma  | 43  | 1983 | -0.12 |
| 85 | Prospective study of blunt aortic injury: Multicenter Trial of the American Association for the Surgery of Trauma        | Fabian TC, Richardson JD, Croce MA, et al.      | J Trauma  | 495 | 1997 | -0.11 |
| 86 | Arterial bullet embolism following thoracic gunshot wounds                                                               | Trimble C.                                      | Ann Surg  | 12  | 1968 | -0.11 |
| 87 | Operative chest wall fixation with osteosynthesis plates                                                                 | Engel C, Krieg JC, Madey SM, et al.             | J Trauma  | 58  | 2005 | -0.11 |
| 88 | The injured colon                                                                                                        | Burch JM, Brock JC, Gevirtzman L, et al.        | Ann Surg  | 82  | 1986 | -0.11 |
| 89 | The unrecognized epidemic of blunt carotid arterial injuries: early diagnosis improves neurologic outcome                | Biffi WL, Moore EE, Ryu RK, et al.              | Ann Surg  | 257 | 1998 | -0.11 |
| 90 | Primary repair of the colon: when is it a safe alternative?                                                              | Shannon FL, Moore EE.                           | Surgery   | 96  | 1985 | -0.11 |
| 92 | Initial evaluation and management of gunshot wounds to the face                                                          | Demetriades D, Chahwan S, Gomez H, et al.       | J Trauma  | 88  | 1998 | -0.11 |
| 91 | Correlating weather and trauma admissions at a level I trauma center                                                     | Rising WR, O'Daniel JA, Roberts CS.             | J Trauma  | 71  | 2006 | -0.11 |
| 93 | Fracture of the occipital condyle: case report and review of the literature                                              | Desai SS, Coumas JM, Danylevich A, et al.       | J Trauma  | 32  | 1990 | -0.11 |
| 94 | Coccygectomy for coccygodynia: do we really have to wait?                                                                | Cebesoy O, Guclu B, Kose KC, et al.             | Injury    | 33  | 2007 | -0.11 |
| 95 | The injured colon: relationships of management to complications                                                          | Flint LM, Vitale GC, Richardson JD, et al.      | Ann Surg  | 103 | 1981 | -0.11 |
| 99 | Packing and planned reexploration for hepatic and retroperitoneal hemorrhage: critical refinements of a useful technique | Cué JJ, Cryer HG, Miller FB, et al.             | J Trauma  | 162 | 1990 | -0.11 |
| 97 | High-pressure injection injuries of the hand                                                                             | Pai CH, Wei DC, Hou SP.                         | J Trauma  | 36  | 1991 | -0.11 |
| 96 | Bilateral thoracoabdominal impalement: avoiding pitfalls in the management of impalement injuries                        | Thomson BN, Knight SR.                          | J Trauma  | 22  | 2000 | -0.11 |

---

|     |                                                                |                       |          |   |      |       |
|-----|----------------------------------------------------------------|-----------------------|----------|---|------|-------|
| 98  | Bilateral sacroiliac joint fracture-dislocation: a case report | Carl A, Thomas S.     | J Trauma | 5 | 1990 | -0.11 |
| 100 | Transcorpis impalement: occurrence in an unusual manner        | Knott LH, Barnett WO. | J Trauma | 0 | 1978 | -0.11 |
